# APETALA2 negatively regulates multiple floral organ identity genes in *Arabidopsis* by recruiting the co-repressor TOPLESS and the histone deacetylase HDA19

Naden T. Krogan<sup>1</sup>, Kendra Hogan<sup>1,2</sup> and Jeff A. Long<sup>1,\*</sup>

## SUMMARY

The development and coordination of complex tissues in eukaryotes requires precise spatial control of fate-specifying genes. Although investigations of such control have traditionally focused on mechanisms of transcriptional activation, transcriptional repression has emerged as being equally important in the establishment of gene expression territories. In the angiosperm flower, specification of lateral organ fate relies on the spatial regulation of the ABC floral organ identity genes. Our understanding of how the boundaries of these expression domains are controlled is not complete. Here, we report that the A-class organ identity gene *APETALA2* (*AP2*), which is known to repress the C-class gene *AGAMOUS*, also regulates the expression borders of the B-class genes *APETALA3* and *PISTILLATA*, and the E-class gene *SEPALLATA3*. We show that *AP2* represses its target genes by physically recruiting the co-repressor *TOPLESS* and the histone deacetylase *HDA19*. These results demonstrate that *AP2* plays a broad role in flower development by controlling the expression domains of numerous floral organ identity genes.

**KEY WORDS:** *APETALA2*, Floral development, Transcriptional repression, *Arabidopsis*

## INTRODUCTION

In multicellular organisms, complex functional structures often require precise spatial arrangements of individual tissues. How the identities of these different tissues are established is a central question in developmental biology, and usually involves domain-specific expression patterns of fate-specifying genes. Although early studies on eukaryotic gene expression focused on mechanisms of transcriptional activation, it has become clear that transcriptional repression is equally important in the regulation of cell identity (Gray and Levine, 1996). Gene expression boundaries underlying many patterning processes rely on DNA-binding transcription factors that negatively regulate target genes by interacting with co-repressors. These co-repressors recruit proteins that confer active transcriptional repression, including chromatin-modifying factors (Courey and Jia, 2001). Co-repressors of the Groucho (Gro)/Transducin-like enhancer of split (TLE) family are well characterized in animal systems and have been implicated in a myriad of developmental events, including *Drosophila* dorsoventral patterning and vertebrate anteroposterior patterning (Buscariet and Stifani, 2007).

In plants, the flower is a useful model for investigating transcriptional mechanisms of fate specification. It comprises four types of lateral organs (sepals, petals, stamens and carpels) arranged in concentric whorls in eudicots (numbered 1 to 4 from the peripheral sepals to the central carpels). Floral organ identity genes specify the fate of each whorl, and their misregulation can lead to homeotic conversions of one organ type to another. Such conversions are produced by a number of classic mutants in model

angiosperm species such as *Arabidopsis* and *Antirrhinum*, the study of which led to the establishment of the ABC model of flower development over two decades ago (Bowman et al., 1991; Coen and Meyerowitz, 1991). This model posits that three functions, termed A, B and C, act alone or in combination to specify the identities of the floral lateral organs. A-function specifies sepal fate, A and B together confer petal identity, B and C jointly specify stamen fate, and C confers carpel identity in the central whorl. Additionally, A and C were hypothesized to operate antagonistically by restricting each other's functional domains. In *Arabidopsis*, these activities were originally attributed to four genes based on genetic analyses: *APETALA2* (*AP2*) provided A-function; *APETALA3* (*AP3*) and *PISTILLATA* (*PI*) conferred B-function; and *AGAMOUS* (*AG*) provided C-function. *APETALA1* (*API*) was later identified as another A-function gene (Bowman et al., 1993), and more recently, an E-function has been defined by the *SEPALLATA* (*SEP*)1–4 family (Pelaz et al., 2000; Ditta et al., 2004). Like the ABC factors (with the exception of *AP2*), SEPs are MADS-domain proteins, and they facilitate the formation of ABCE transcriptional complexes that specify floral organ fate (Honma and Goto, 2001). Quadruple loss-of-function *sep* mutants have flowers consisting solely of leaf-like organs (Ditta et al., 2004), and ectopic expression of *SEP* and ABC genes is sufficient to convert leaves into floral organs (Honma and Goto, 2001; Pelaz et al., 2001). Unlike the ABC genes, expression of which is generally confined to two neighboring whorls, most *SEP* genes are expressed in all floral organ primordia. *SEP3* is an exception, as its expression is mainly restricted to the inner three whorls (Mandel and Yanofsky, 1998).

Although ABCE genes are initially activated by floral meristem identity genes (Weigel et al., 1992; Bowman et al., 1993; Weigel and Meyerowitz, 1993; Lee et al., 1997), their functional domains are refined by cadastral regulators that establish the boundaries of their expression. *AP2* restricts *AG* expression to whorls 3 and 4, and in strong *ap2* mutants, *AG* spreads throughout the flower resulting in carpel-like whorl 1 organs and loss of whorl 2 organs (Bowman et al., 1991; Drews et al., 1991). Other factors have been

<sup>1</sup>Plant Molecular and Cellular Biology Laboratory, The Salk Institute for Biological Studies, 10010 North Torrey Pines Road, La Jolla, CA 92037, USA. <sup>2</sup>Division of Biological Sciences, Section of Cell and Developmental Biology, University of California at San Diego, 9500 Gilman Drive, La Jolla, CA 92093, USA.

\* Author for correspondence (long@salk.edu)

shown to contribute to the spatial restriction of *AG* (Byzova et al., 1999; Bao et al., 2004; Takeda et al., 2004; Krizek et al., 2006), including the transcriptional co-repressor LEUNIG (LUG) and its interacting partner SEUSS (SEU) (Liu and Meyerowitz, 1995; Conner and Liu, 2000; Franks et al., 2002). SUPERMAN (SUP), a C2H2-type zinc finger protein, is necessary for maintaining the inner boundary of B-class gene expression between whorls 3 and 4, as *AP3* expression expands into the central region of *sup* flowers, producing ectopic stamens at the expense of carpels (Schultz et al., 1991; Bowman et al., 1992; Sakai et al., 1995). A small RNA (miR172) that regulates *AP2* also aids in the establishment of this border, as overexpression of an miRNA-resistant *AP2* transgene results in expansion of *AP3* and *PI* towards the center of the floral meristem (Park et al., 2002; Aukerman and Sakai, 2003; Chen, 2004; Zhao et al., 2007). Despite these advances, many questions regarding the spatial control of the ABCE genes remain. For instance, the mechanisms underlying many of these regulatory relationships, including the inhibition of *AG* by *AP2*, have yet to be fully characterized. Additionally, it is unknown whether cadastral regulators directly restrict the peripheral expansion of B- and E-class (*SEP3*) genes in the outermost whorl.

Here, we report one molecular mechanism underlying the repression of *AG* by *AP2*, a genetic relationship that contributed to one of the original principles of the ABC model (antagonism of C- by A-function). Specifically, we show that *AP2* directly represses *AG* by recruiting a transcriptional co-repressor and a histone deacetylase. This *AP2* repressor complex also targets B- and E-class genes to restrict their expression in whorl 1, elucidating new regulatory roles for *AP2* not previously defined in the ABC model. Collectively, these results show that *AP2* plays a broad role in flower development, spatially controlling the expression domains of multiple floral organ identity genes.

## MATERIALS AND METHODS

### Plant material

Plants were grown on soil in greenhouse conditions under a 16-hour light/8-hour dark cycle. The Landsberg *erecta* (*Ler*) ecotype of *Arabidopsis* was used as wild type. Genetic analyses utilized the previously described mutants *tpl-1* (Long et al., 2002), *tpl-2*, *tpr1*, *tpr3*, *tpr4*, *hda19-1* (Long et al., 2006), *ap2-2*, *pi-1*, *ag-1* (Bowman et al., 1989), *ap3-3* (Jack et al., 1992) and *sep3-2* (Pelaz et al., 2000). *tpr2* is a T-DNA insertion allele (SALK\_112730) (Alonso et al., 2003). Owing to the unavailability of *Ler sep3* alleles, *tpl-1* was introgressed into the Col-0 ecotype and then crossed to the *sep3-2* mutant for genetic analyses. To genotype plants for *tpl-1*, *hda19-1*, *ap2-2*, *ap3-3*, *pi-1*, *ag-1* and *sep3-2* mutant alleles, DNA extractions were used as template in PCR with primers given in supplementary material Table S1.

### RNA in situ hybridization

RNA in situ hybridizations with digoxigenin-labeled riboprobes were performed as described at [http://pbio.salk.edu/pbio/in\\_situ\\_protocol.html](http://pbio.salk.edu/pbio/in_situ_protocol.html). Probes used for detecting expression of *AP3* (Jack et al., 1992), *PI* (Goto and Meyerowitz, 1994), *AG* (Yanofsky et al., 1990) and *HDA19* (Long et al., 2006) have been detailed previously. The entire coding region of *TPL* was used as probe. Three different *SEP3* probes were used and all produced similar expression patterns. These included the full-length coding sequence and two probes previously described (Mandel and Yanofsky, 1998; Liu et al., 2009). Stages attributed to flowers, as described in figure legends, are based on standard convention (Smyth et al., 1990).

### Protein interaction analyses

Yeast two-hybrid (Y2H) assays were performed with yeast strain MaV203 using Invitrogen ProQuest expression vectors and product protocols. Semi-in vivo pull-down experiments with TPL and TPL N176H GST fusions, including expression and purification of recombinant proteins, were carried

out as previously reported (Szemenyei et al., 2008) with minor modifications. Specifically, unopened floral buds from stages 1 to 12 (Smyth et al., 1990), along with the inflorescence meristem, were harvested from stably transformed *Arabidopsis* lines and processed to produce plant lysates. TPL Y2H and GST fusion constructs have been described (Szemenyei et al., 2008). PCR-generated *AP2* cDNAs were cloned in-frame into *Sall*-*NotI* sites of pDBLeu and pEXP-AD502 Y2H vectors (Invitrogen) or into *XbaI*-*Sall* sites of GST expression vector pGEX-KG. Conserved leucines within the EAR motif of *AP2* were converted to alanines (CTCGATTTGAGCTTG to gcCGATgcGAGCgcG) by site-directed mutagenesis. Bimolecular fluorescence complementation (BiFC) experiments were performed in a tobacco transient expression system as previously detailed (Szemenyei et al., 2008). A full-length *HDA19* genomic clone (*XhoI*-*KpnI*) was used to generate BiFC expression constructs.

### Chromatin immunoprecipitation (ChIP) and western blots

ChIP experiments were performed as previously described (Bowler et al., 2004; Smith and Long, 2010) with the following modifications. Starting material consisted of unopened floral buds from stages 1 to 12 (Smyth et al., 1990), along with the inflorescence meristem. Protein G Dynabeads (Invitrogen) were used with anti-HA (Covance HA.11), anti-GFP (Abcam ab290), or anti-H4K16Ac (Active Motif 39167) antibodies in immunoprecipitations. Tissues expressing epitope-tagged *HDA19* were pre-treated with 1.5 mM ethylene glycol bis(succinimidylsuccinate) (EGS) (Thermo Scientific) for 1 hour under vacuum. Pre-treatment of non-transgenic wild-type (*Ler*) tissue with EGS did not significantly affect ChIP enrichment values relative to non-EGS-treated control tissue. Therefore, EGS-treated *Ler* control values are not presented in Fig. 2I, Fig. 3O, Fig. 5L and supplementary material Fig. S4. Anti-H3K9Ac (Abcam ab4441), anti-H4K5Ac (AbD Serotec AHP962) and anti-H3 (Abcam ab1791) antibodies were used for western blotting. Western signal intensities were quantified using ImageJ software (National Institutes of Health, <http://imagej.nih.gov/ij>).

### Real-time PCR

Real-time PCR on ChIP samples was performed with a Bio-Rad CFX96 Real-time PCR system using Bio-Rad SsoFast EvaGreen Supermix reagents according to manufacturer protocols. Data analysis, including calculation of primer pair reaction efficiencies and Ct values, was carried out by Bio-Rad CFX Manager software. Enrichment was calculated as a ratio of the signal from ChIP samples to that from input samples. Fold enrichment was presented based on normalization with *ACT2* data.

### Transgenic plant lines

*Arabidopsis* transgenic lines were generated by the *Agrobacterium*-mediated floral dip method into the *Ler* ecotype (Clough and Bent, 1998). *HDA19p::HDA19-HA* was made using a PCR-generated *HDA19* genomic clone (including 716 bp of promoter sequence) that was introduced into the *XhoI* site of plasmid pBJ36 (Eshed et al., 2001) upstream of a 6xHA epitope tag. This fusion gene was subcloned into the *NotI* site of binary vector pART27 (Gleave, 1992), transformed into *hda19-1*, and fully complemented the mutant. *AP2* and *AP2mEAR* cDNAs were cloned as PCR-generated *Sall*-*KpnI* fragments downstream of the 2x35S promoter and upstream of GFP in vector pBJ36. Each *AP2* fusion was subcloned into a sulfadiazine resistance binary vector (Heisler et al., 2010) and transformed into *hda19-1* *HDA19p::HDA19-HA* for use in pull-down assays. The TPLp::TPL-HA transgenic line employed in pull-down and ChIP experiments has been described (Szemenyei et al., 2008). TPLp::TPL-GFP, *HDA19p::HDA19-GFP* and *AP2p::AP2-2xYFP-3xHA* transgenes used in ChIP assays have been published previously (Long et al., 2006; Wollmann et al., 2010).

TPLp::TPL-AP2DBs is a translational fusion between a full-length *TPL* cDNA and the coding sequence for the DNA-binding domains of *AP2*, followed by the recognition sequence for the small RNA miR172. This transgene was cloned into vector pBJ36 behind 4.13 kb of TPL promoter sequence and upstream of GFP. The *TPL* coding sequence was removed from this construct and a start codon was introduced into AP2DBs to produce the control transgene TPLp::AP2DBs. PCR was used to generate AP2DBs fragments with *SmaI* restriction sites at their termini to facilitate

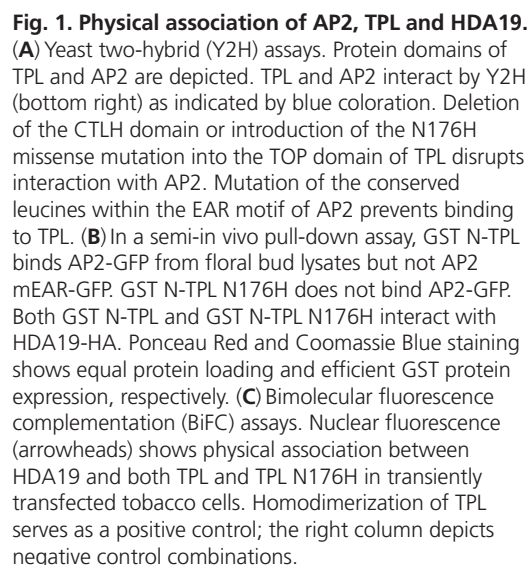

To generate 2x35Sp::SEP3, a full-length *SEP3* cDNA was amplified by PCR (as a *Clal*-*Bam*HI fragment) and cloned downstream of a 2x35S promoter and upstream of YFP-3xHA in plasmid pBJ36. This transgene was transferred into the *NotI* site of binary vector pMLBART and transformed into a *Ler* wild-type background.

The transcriptional repression assay employing the  $\beta$ -glucuronidase (GUS) reporter was performed as previously described (Szemenyei et al., 2008). 2x35Sp::AP2-GAL4DB-3xHA was generated by fusing a full-length *AP2* cDNA clone (*SalI-KpnI*) to GAL4DB-3xHA in pJB36. This transgene was then transferred into the *NotI* site of pMLBART for plant transformation.

RNA in situ hybridizations were imaged using a Leica DM5000B compound microscope. Whole flowers and floral organs were imaged with a Leica MZ FLIII stereomicroscope. Scanning electron micrographs were acquired using a Zeiss EVO LS 15 analytical environmental scanning electron microscope.

Although it is well established that AP2 represses *AG*, the molecular mechanism behind this control is not known (Drews et

al., 1991; Yant et al., 2010). Using a yeast two-hybrid (Y2H) screen, we determined that AP2 physically interacts with the Gro/Tup1-type co-repressor TOPLESS (TPL), a result confirmed in a recent report (Causier et al., 2012). This interaction depended on the C-Terminal to Lissencephaly Homology (CTLH) domain of TPL (Fig. 1A), which is required for other reported TPL protein interactions (Szemenyei et al., 2008; Gallavotti et al., 2010). AP2 contains a consensus ERF-associated amphiphilic repression (EAR) motif (LxLxL) (Fig. 1A) (Ohta et al., 2001; Kagale et al., 2010), which has been implicated in the physical recruitment of TPL by various proteins (Szemenyei et al., 2008; Gallavotti et al., 2010; Pauwels et al., 2010). Mutation of the AP2 EAR motif (mEAR) abolished interaction with TPL in yeast, showing that this motif is necessary for AP2-TPL association (Fig. 1A). The *tpl-1* missense mutation (N176H), which acts as a dominant negative for the *TOPLESS RELATED* (*TPR*) family (Long et al., 2006), also disrupted binding with AP2 in yeast (Fig. 1A). We verified these results using semi-in vivo pull-down assays (Szemenyei et al., 2008), testing the ability of recombinant GST-tagged TPL or TPL N176H amino-terminal fragments to bind GFP fusions of wild-type AP2 or AP2mEAR expressed in stable transgenic *Arabidopsis* lines. GST-N-TPL, but not GST-N-TPL N176H, interacted with wild-type AP2-GFP (Fig. 1B), whereas both GST-TPL variants were able to bind to full-length TPL (supplementary material Fig. S1A) (Szemenyei et al., 2008). Consistent with our Y2H data, GST-N-TPL was unable to pull-down AP2mEAR (Fig. 1B).



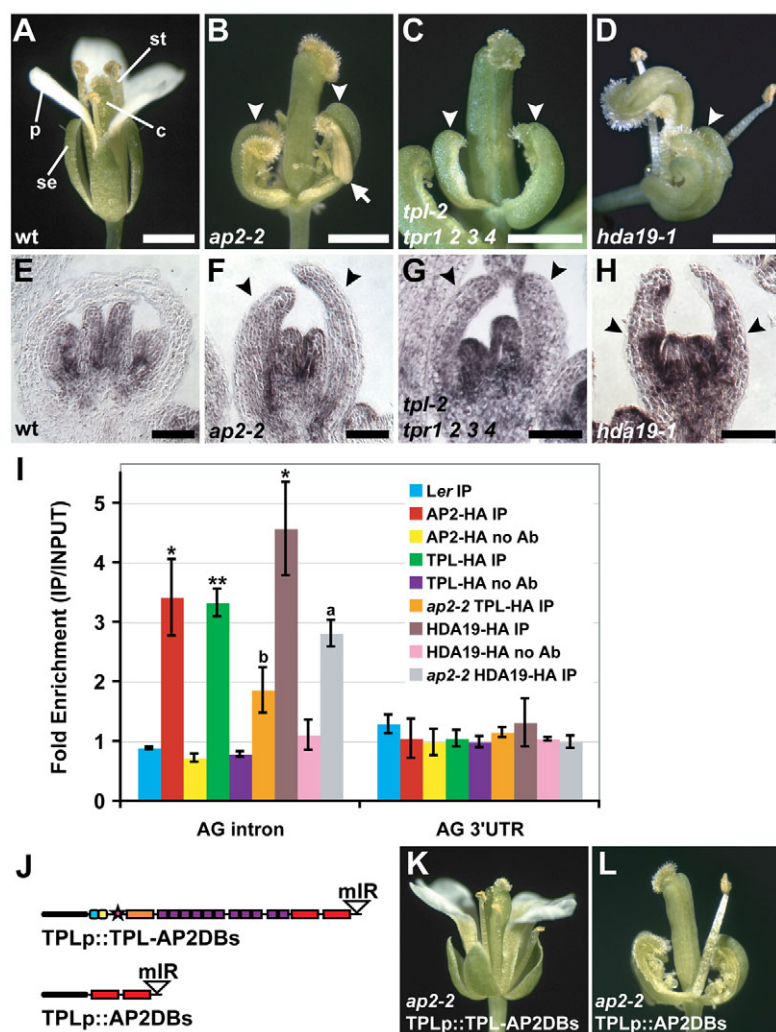

**Fig. 2. AP2, TPL and HDA19 cooperatively repress the C-class gene *AG* in outer whorl floral organs.** (A) Wild-type *Arabidopsis* flower composed of four sepals (se), four petals (p), six stamens (st) and two fused carpels (c). (B–D) Mutant flowers exhibiting carpel-like whorl 1 organs (arrowheads) with stigmatic tissue at their margins. Arrow in B designates stamen-like identity. (E–H) *AG* in situ hybridizations on stage 7–8 flowers. (E) Wild-type flower with expression restricted to stamen and carpel primordia. (F–H) Mutants expressing *AG* throughout the flower (arrowheads). (I) Anti-HA ChIP showing specific binding of AP2, TPL and HDA19 to the second *AG* intron. Control ChIPs were performed on non-transgenic wild-type tissue (Ler) or without antibody (no Ab). Data were normalized relative to input and ACT2 abundance. Data are represented as mean  $\pm$  s.e.m. of at least two biological replicates. Student's *t*-test was used to determine the significance of target enrichment relative to Ler IP (\* $P \leq 0.05$ , \*\* $P \leq 0.005$ ) and the significance of decreased binding in *ap2-2* (a,  $P \leq 0.08$ ; b,  $P \leq 0.05$ ). (J) Transgenes used in K, L. Domains are described in Fig. 1A. The *TPL* promoter is depicted as a black oval. (K) TPLp::TPL-AP2DBs rescues *ap2-2* floral defects. Compare with A, B. (L) TPLp::AP2DBs is insufficient to rescue *ap2-2*. Scale bars: 1 mm in A–D; 50  $\mu$ m in E–H.

Co-repressors commonly recruit chromatin-remodeling factors to actively repress gene expression, and prior genetic analyses implicated the RPD3-like HISTONE DEACETYLASE 19 (HDA19) in TPL-dependent transcriptional regulation (Long et al., 2006). Therefore, we assessed the ability of TPL to pull-down HDA19-HA, which was expressed in the same transgenic *Arabidopsis* lines described above. Unlike AP2, HDA19 associated with both GST-N-TPL and GST-N-TPL N176H (Fig. 1B), and this was confirmed in planta using bimolecular fluorescence complementation (BiFC) (Fig. 1C). From these assays, we cannot determine whether the TPL-HDA19 interaction is direct, as adapter proteins may facilitate association between the two factors. Regardless, these findings suggest a potential mechanism for the dominant-negative nature of *tpl-1*: the TPL N176H mutant protein cannot bind AP2 but can interact with both TPL and HDA19, thereby ‘poisoning’ TPL/TPR-HDA19 complexes and preventing their recruitment to genomic loci by transcription factors such as AP2 (supplementary material Fig. S1B). In summary, our interaction data indicates that AP2 regulates target gene expression as part of a transcriptional repression complex that includes the co-repressor TPL and histone deacetylase HDA19.

### The AP2-TPL-HDA19 repressor complex negatively regulates the C-class gene *AG*

We next sought to determine whether AP2 recruits TPL and HDA19 to regulate the C-class gene *AG*, which is expressed in

whorls 3 and 4 and specifies the identities of the reproductive organs (Yanofsky et al., 1990). We performed RNA in situ hybridizations with *TPL* and *HDA19* probes and found that both factors are broadly expressed in floral development and overlap with *AP2* expression in outer whorl floral organ primordia, where *AG* is not normally expressed (supplementary material Fig. S2) (Wollmann et al., 2010). Additionally, genetic analyses showed that *tpl-2 tpr1 tpr2 tpr3 tpr4* quintuple loss-of-function mutants and late-arising flowers of *hda19-1* exhibit carpelloid outer whorl organs resembling those of strong *ap2-2* mutants (Fig. 2B–D). All of these genetic backgrounds display *AG* misexpression throughout the flower (Fig. 2F–H) (Drews et al., 1991), indicating that *AG* is repressed not only by AP2, but also by redundantly acting members of the TPL/TPR family and HDA19. In the case of *hda19-1*, flowers begin to display carpelloid whorl 1 organs after ~20 flowers have been initiated. This is well before the termination of the inflorescence meristem, thereby distinguishing *hda19-1* flowers from the ‘terminal carpelloid flower’ defects displayed by other mutants (Bao et al., 2004).

AP2 was recently shown to directly bind the second intron of *AG* (Yant et al., 2010; Dinh et al., 2012). Using chromatin immunoprecipitation (ChIP), we showed that this region of the second *AG* intron (supplementary material Fig. S3A) was specifically enriched in TPL and HDA19 immunoprecipitated

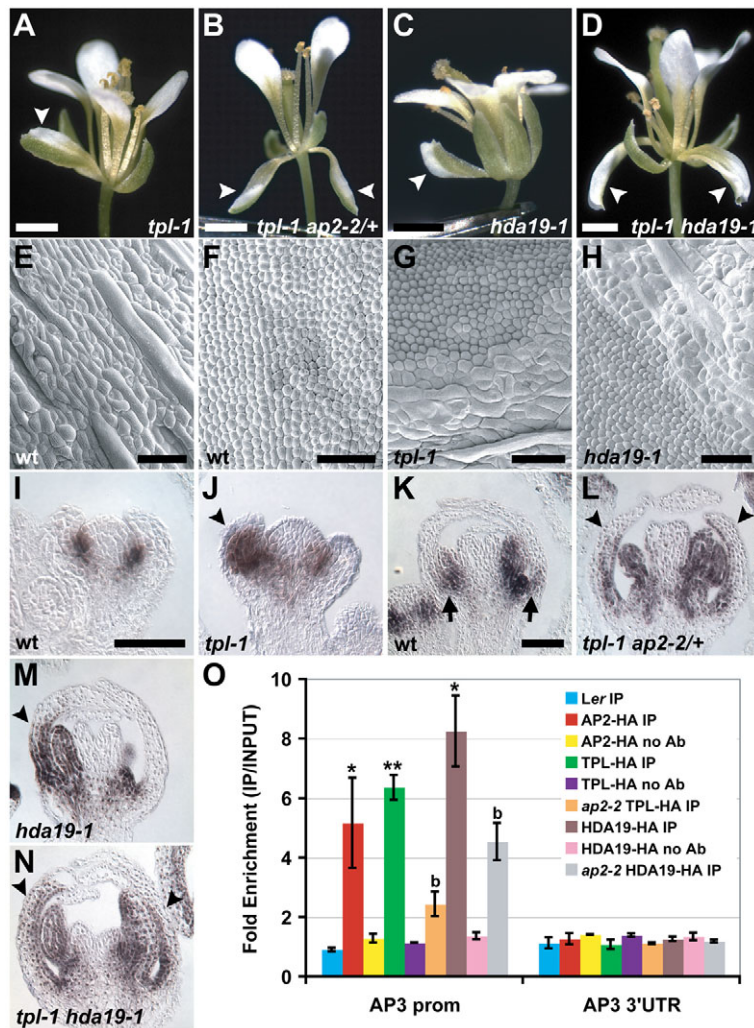

**Fig. 3. AP2, TPL and HDA19 repress the B-class gene *AP3* in whorl 1 organs.** (A–D) Mutant *Arabidopsis* flowers with sepal-to-petal homeotic conversions (arrowheads). Compare with wild type in Fig. 2A. (E–H) Scanning electron micrographs of abaxial surfaces of floral organs. (E) Elongated epidermal cells of wild-type sepals are variable in size. (F) Slightly conical cells of wild-type petals are relatively uniform in size. (G) *tpl-1* and (H) *hda19-1* mosaic whorl 1 organs with a sharp boundary between sepal and petal identity. (I–N) *AP3* in situ hybridizations on stage 4 (I, J) and stage 7–8 (K–N) flowers. (I) *AP3* is not expressed in young wild-type sepal primordia. (J) Ectopic *AP3* expression in a young *tpl-1* whorl 1 organ (arrowhead). (K) *AP3* is detectable in later-stage wild-type sepals, but only at the organ base (arrows). (L–N) *AP3* expression domains are expanded in mutant whorl 1 organs (arrowheads). (O) Anti-HA ChIP showing AP2, TPL and HDA19 specifically bind the *AP3* promoter. Control ChIPs were performed on non-transgenic wild-type tissue (Ler) or without antibody (no Ab). Data were normalized relative to input and ACT2 abundance. Data are represented as mean  $\pm$  s.e.m. of at least two biological replicates. Student's *t*-test was used to determine the significance of target enrichment relative to Ler IP (\* $P \leq 0.05$ , \*\* $P \leq 0.005$ ) and the significance of decreased binding in *ap2-2* (b,  $P \leq 0.05$ ). Scale bars: 1 mm in A–D; 100  $\mu$ m in E–H; 50  $\mu$ m in I–N.

samples, as well as in AP2 control ChIP experiments (Fig. 2I; supplementary material Fig. S4A). Enrichment was diminished in *ap2-2*, a protein-null allele (Chen, 2004) but not absent (Fig. 2I), potentially owing to the ability of TPL to interact physically with redundantly functioning AP2 homologs (Causier et al., 2012). This decrease in enrichment was not due to a reduction of TPL or HDA19 levels (supplementary material Fig. S3D).

To test further the functional importance of AP2-mediated recruitment of TPL, we fused TPL to the DNA-binding domains of AP2 along with the recognition sequence of miR172 (which controls AP2 distribution) (Aukerman and Sakai, 2003; Chen, 2004). This transgene rescued *ap2-2* floral defects (Fig. 2J,K), indicating that recruitment of TPL to AP2 target genes can functionally substitute for AP2. This also suggests that to correctly pattern perianth (sepal and petal) whorls, AP2 predominantly acts as a transcriptional repressor. In agreement with this, AP2 negatively regulated the expression of a reporter gene in perianth organs in a transcriptional repression assay (supplementary material Fig. S5). Collectively, our results indicate that AP2 functions as a transcriptional repressor in floral patterning, and does so by recruiting TPL and, in turn, HDA19. Moreover, this reveals a molecular mechanism for AP2-mediated repression of *AG*, as all complex members associate with the second intron of *AG* during floral development and repress its transcription in outer whorls.

### AP2, TPL and HDA19 restrict petal fate by regulating the outer boundary of B-class gene expression

Whereas *tpl-2 tpr1 tpr2 tpr3 tpr4* quintuple mutant flowers resemble those of strong *ap2* alleles, the *tpl-1* mutant displays partial sepal-to-petal homeotic conversions (Fig. 3A,G). Such conversions are also found in *tpl-2 tpr1 tpr3 tpr4* quadruple loss-of-function mutant flowers (supplementary material Fig. S6A) indicating that *tpl-1* is not a complete dominant negative for the TPL/TPR family during floral patterning, as it is during embryogenesis (Long et al., 2006). Flowers of *tpl-1 ap2-2/+* mutants show a much higher frequency of sepal-to-petal conversions compared with *tpl-1* alone (Fig. 3B; supplementary material Table S2). Therefore, TPL and AP2 appear to cooperatively repress petal identity in whorl 1, revealing a new role for AP2 in floral patterning that is not predicted by the ABC model. HDA19 is also involved in this repression, as similar homeotic transformations occur in early-arising flowers of *hda19-1* (Fig. 3C,H), and the frequency of these is greatly increased in *tpl-1 hda19-1* mutants (Fig. 3D; supplementary material Table S2). Finally, like *ap2-2/+*, *hda19-1/+* heterozygous mutations enhance the frequency of *tpl-1* sepal-to-petal conversions (supplementary material Table S2).

The sepal-to-petal conversions displayed by the mutant combinations described above suggest misregulation of the B-class genes *AP3* and *PI* in the first floral whorl. In wild type, both genes



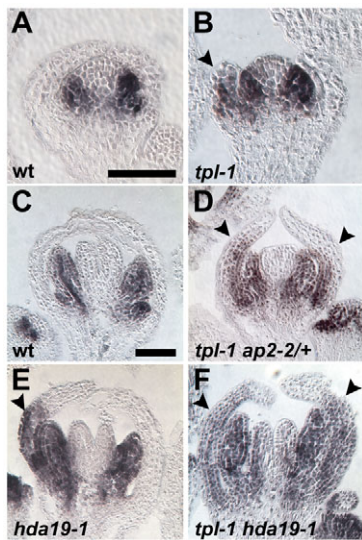

**Fig. 4. The B-class gene *PI* is misexpressed in the outer whorl of *tpl-1* and *hda19-1* mutant backgrounds. (A-F) *PI* in situ hybridizations. (A,B) Stage 4 and (C-F) stage 7-8 *Arabidopsis* flowers. (A,C) *PI* is not expressed in whorl 1 organs in either stage of floral development. (B,D-F) *PI* is ectopically expressed in mutant whorl 1 organs (arrowheads). Scale bars: 50  $\mu$ m.**

are predominantly expressed in whorls 2 and 3 where they cooperatively specify petal and stamen fate (Fig. 3I,K; Fig. 4A,C) (Jack et al., 1992; Goto and Meyerowitz, 1994). *AP3* is also expressed at the base of wild-type sepals in later stages of their development (Fig. 3K) (Weigel and Meyerowitz, 1993). *PI* expression is not detectable in whorl 1 organs at any stage (Goto and Meyerowitz, 1994). In flowers of *tpl-1*, *ap2-2* and *hda19-1* mutant combinations, however, *PI* is ectopically expressed in outer whorl organs (Fig. 4B,D-F), and *AP3* is expressed precociously in newly initiated sepal primordia and in a much larger domain in older whorl 1 organs (Fig. 3J,L-N). The whorl 1 homeotic conversions displayed by these mutants not only correlate with this B-class gene misregulation but depend upon it, as either *ap3-3* or *pi-1* completely suppresses sepal-to-petal transformations (supplementary material Table S2).

To determine whether AP2 recruits TPL and HDA19 to directly repress B-class genes, we performed ChIP experiments on all three factors. Consistent with published AP2 ChIP with high-throughput sequencing (ChIP-seq) data (Yant et al., 2010), we did not detect binding of AP2 to the *PI* promoter. However, AP2, TPL and HDA19 did bind a common promoter region of *AP3* (Fig. 3O; supplementary material Fig. S3B, Fig. S4B), and binding by TPL and HDA19 was reduced in *ap2-2* (Fig. 3O). Although *AP3* was not reported as being significantly bound by AP2 in ChIP-seq analyses (Yant et al., 2010), evidence of AP2 binding to this region of the *AP3* promoter could be detected in the raw data available from this study. Therefore, the role of AP2 in restriction of petal fate appears to involve the direct repression of *AP3* and, probably, the indirect repression of *PI*.

Based on these regulatory relationships, ectopic B-class gene expression would be predicted in an *ap2* mutant background. Indeed, *AP3* and *PI* are variably misexpressed in whorl 1 organs of *ap2-2* flowers (supplementary material Fig. S6B,C) (Goto and Meyerowitz, 1994). Consistent with this misexpression, *ap2-2* carpelloid whorl 1 organs often produce tissue with stamen identity

at their margins (Fig. 2B) (Bowman et al., 1991). By contrast, *AP3* and *PI* levels are vastly reduced in their normal domains of expression in strong *ap2* mutants (supplementary material Fig. S6B,C) (Jack et al., 1992; Goto and Meyerowitz, 1994). This apparent contradiction can be explained by the loss of whorl 2 and 3 organs in *ap2* due to the spread of C-function, which plays a role in meristem determinacy (Jack et al., 1992; Goto and Meyerowitz, 1994). As a result, decreased expression of B-class genes might simply be an indirect consequence of reduced cellular proliferation within the floral whorls in which they act. In agreement with this, whorl 2 and 3 organ production and the expression domains of *AP3* and *PI* are restored in an *ap2 ag* double mutant background (supplementary material Fig. S6E,F) (Zhao et al., 2007).

### AP2, TPL and HDA19 directly repress expression of the E-class gene *SEP3* in the outer floral whorl

The absence of evidence for direct regulation of *PI* by AP2 prompted us to consider that AP2 might negatively regulate *PI* indirectly in first whorl organs by repressing an upstream activator. One such candidate is the AP2 target *SEP3* (Yant et al., 2010), a direct positive regulator of floral organ identity genes, including *PI* (Kaufmann et al., 2009). Unlike other *SEP* genes, *SEP3* is not normally expressed in newly initiated outer whorl organ primordia (Fig. 5A) (Mandel and Yanofsky, 1998). However, it expands to this domain in *ap2-2* flowers (supplementary material Fig. S6D), as well as in *tpl-1*, *tpl-1 ap2-2/+* and *hda19-1* flowers (Fig. 5C,E,F). Stage 4 *tpl-1* flowers variably display *SEP3* expression throughout sepal primordia, whereas at this stage in wild type, *SEP3* is restricted to the distal tips (Fig. 5B,D) (Kaufmann et al., 2009). To test whether *SEP3* misexpression is required for sepal-to-petal conversions, we introduced the *sep3-2* mutation (Pelaz et al., 2000) into the *tpl-1* background, which shows homeotic changes in first whorl organs in a temperature-dependent manner. At both temperatures analyzed, *sep3-2* completely suppressed *tpl-1* homeotic conversions in the first whorl (Fig. 5G; supplementary material Table S2). To determine whether *SEP3* expression in the first whorl is sufficient to alter sepal fate, we overexpressed *SEP3* and saw varying degrees of sepal-to-petal conversions in the flowers of multiple independent transgenic lines (Fig. 5H-K). These observations suggest that when AP2, TPL and HDA19 function is compromised, *SEP3* is misexpressed in whorl 1 and promotes ectopic petal identity. Consistent with this, both TPL and HDA19 associated with the same two promoter regions of *SEP3* that AP2 has been shown to bind (Fig. 5L; supplementary material Fig. S3C, Fig. S4C) (Yant et al., 2010), and binding by TPL and HDA19 was reduced in *ap2-2* (Fig. 5L). Therefore, AP2 restricts the outer boundary of petal fate not only by controlling the expression domains of B-class genes, but also by directly repressing the E-class gene *SEP3* in whorl 1.

### Histone acetylation levels at AP2 target genes increase in an *ap2-2* background

Because AP2 appears to recruit HDA19 to repress the transcription of its target genes, an increase in histone acetylation levels at these loci would be predicted in an *ap2-2* mutant background. To test this hypothesis, we first sought to determine which histone acetylation mark(s) are likely to be regulated by HDA19 by assessing global acetylation levels in *hda19-1* flowers. We tested acetylation marks reportedly affected by *hda19* at other developmental stages and/or by RPD3-like histone deacetylases (HDACs) in other systems, including H3K9Ac, H4K5Ac and H4K16Ac (Kadosh and Struhl, 1998; Tian et al., 2005; Benhamed et al., 2006; Miller et al., 2010).

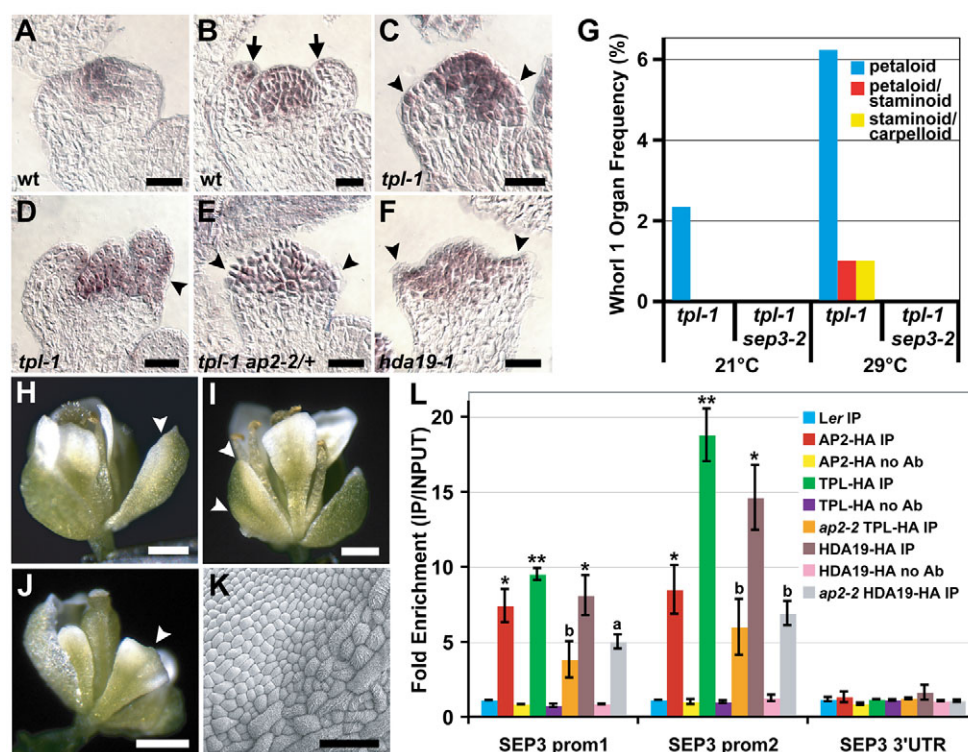

**Fig. 5. The E-class gene *SEP3* is repressed in whorl 1 organ primordia by AP2, TPL and HDA19.** (A–F) *SEP3* in situ hybridizations on stage 3 (A,C,E,F) and stage 4 (B,D) *Arabidopsis* flowers. (A) *SEP3* is not expressed in newly initiated outer whorl organ primordia in wild type. (B) By stage 4, *SEP3* expression is detectable in wild-type sepals, but only at the distal tips of the organs (arrows). (C,E,F) *SEP3* is ectopically expressed in mutant outer whorl organ primordia (arrowheads). (D) Sepal of a stage 4 *tpl-1* flower showing an expanded *SEP3* expression domain (arrowhead). (G) *sep3-2* suppresses whorl 1 homeotic conversions of *tpl-1* at 21°C and 29°C. (H–J) 2x35S::*SEP3* flowers with sepals exhibiting petal identity (arrowheads) on one margin (H), both margins (I) or throughout the entire organ (J). (K) Scanning electron micrograph of a mosaic 2x35S::*SEP3* sepal with ectopic petal epidermal identity (upper left; compare with Fig. 3E,F). (L) Anti-HA ChIP showing binding of AP2, TPL and HDA19 to two regions of the *SEP3* promoter. Control ChIPs were performed on non-transgenic wild-type tissue (*Ler*) or without antibody (no Ab). Data were normalized relative to input and *ACT2* abundance. Data are represented as mean  $\pm$  s.e.m. of at least two biological replicates. Student's *t*-test was used to determine the significance of target enrichment relative to *Ler* IP (\* $P$ ≤0.05, \*\* $P$ ≤0.005) and the significance of decreased binding in *ap2-2* (a,  $P$ ≤0.08; b,  $P$ ≤0.05). Scale bars: 20  $\mu$ m in A–F; 500  $\mu$ m in H–J; 50  $\mu$ m in K.

All modifications were increased to some extent in *hda19-1* flowers compared with wild type, suggesting that HDA19 deacetylates these histone residues in planta (Fig. 6A). Because H4K16Ac showed the greatest increase, we performed ChIP using an antibody against this mark to assess acetylation levels at AP2 target loci in *ap2-2* and wild-type flowers (Fig. 6B). Regulatory regions of both *AG* and *SEP3* that were bound by AP2, TPL and HDA19 showed significantly increased H4K16Ac levels in *ap2-2* (Fig. 6B), even though global levels of H4K16Ac in this background appeared comparable to wild type (Fig. 6A). These results are consistent with our model in which AP2 recruits a TPL-HDA19 repressor complex, as in the absence of AP2, histone marks controlled by HDA19 increase at AP2 target loci. These observations also suggest that unlike the global effect of *hda19-1* on histone acetylation marks, the *ap2-2* mutation affects H4K16Ac levels at specific loci. H4K16Ac abundance was only moderately increased at the *AP3* promoter in *ap2-2* (Fig. 6B), possibly due to the small fraction of cells that misexpress *AP3* in the mutant flower.

## DISCUSSION

In this study, we show that, in combination with TPL and HDA19, AP2 acts as a cadastral regulator of multiple floral homeotic genes to pattern the flower correctly (Fig. 7), broadening our knowledge

of how gene expression boundaries are maintained in eukaryotic development. This includes the C-class gene *AG*, the outer expression boundary of which is controlled by an AP2-TPL-HDA19 repression complex. We therefore determine a molecular mechanism underlying a genetic relationship that contributed to the original formulation of the ABC model (the antagonism of *AG* by AP2).

We demonstrate further that AP2 recruits TPL and HDA19 to restrict whorl 1 expression of *AP3*, *SEP3* and subsequently *PI*. This elucidates the presence of a repressor complex that establishes the peripheral expression boundaries of not only B-class genes but also the E-class gene *SEP3*, for which the restricted domain of activity in young flowers is unique among the *SEPs* (Mandel and Yanofsky, 1998). Our genetic analyses indicate that this regulation is an important aspect of floral patterning, as it is required to prevent the outward spread of petal fate. This represents a novel role for AP2 not predicted in the original ABC model, and in fact appears to disagree with the designation of AP2 as an A-class gene responsible for the specification of perianth fate (see below). Taking into account these new roles, AP2 has now been shown to directly restrict the expression domains of B-, C- and E-class genes in the flower (Fig. 7). Therefore, it is increasingly apparent that AP2 patterns the flower as a transcriptional repressor, a notion

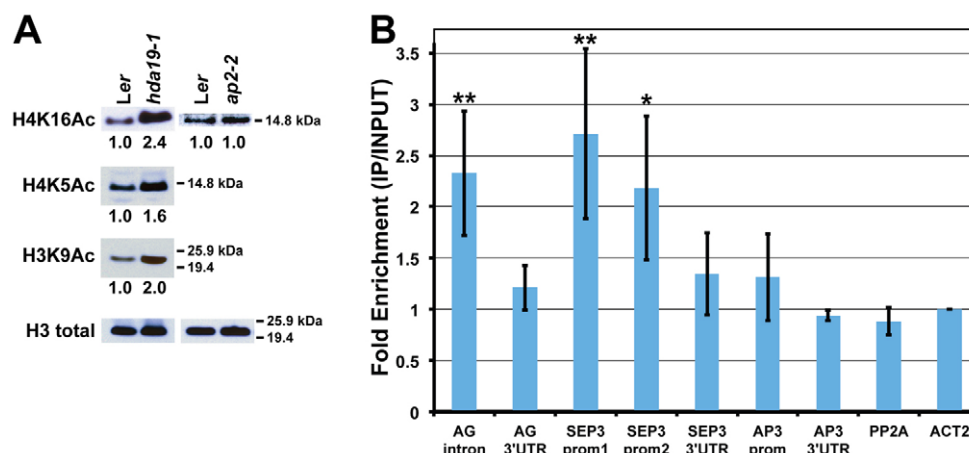

**Fig. 6. The effects of *hda19-1* and *ap2-2* mutation on histone acetylation levels.** (A) Histone acetylation modifications H4K16Ac, H4K5Ac and H3K9Ac are increased in *hda19-1* *Arabidopsis* flowers compared with wild type (left). H4K16Ac levels in *ap2-2* flowers are comparable to that of wild type (right). Band intensities were normalized relative to total histone H3 loading controls. (B) Anti-H4K16Ac ChIP showing enrichment at the second intron of *AG* and at two promoter regions of *SEP3* in *ap2-2* flowers. A slight enrichment is seen at the promoter of *AP3*. Data are represented as mean  $\pm$  s.e.m. of three biological replicates and are presented as the ratio of enrichment in *ap2-2* over that of wild type. Data were normalized relative to INPUT and ACT2 abundance. The constitutively expressed *PP2A* gene serves as a negative control. Student's *t*-test was used to determine the significance of target enrichment relative to *PP2A* (\* $P \leq 0.08$ ; \*\* $P \leq 0.05$ ).

strongly supported by the observation that expression of a fusion protein between the AP2 DNA-binding domains and a transcriptional co-repressor is sufficient to rescue *ap2* floral patterning defects (Fig. 2K).

Although AP2, TPL and HDA19 are all expressed in whorls 1 and 2, petal fate is repressed only in the outermost whorl. The underlying cause of this positional difference is unknown, but it is plausible that AP2 constitutively represses *SEP3* and B-class genes, but in whorl 2, antagonizing activators of petal fate, such as the F-box protein UNUSUAL FLORAL ORGANS (UFO), overcome this repression (Lee et al., 1997). *UFO* acts as a co-factor with the meristem identity gene *LEAFY* (*LFY*) to activate B-function (Lee et al., 1997). Whereas *LFY* is ubiquitously expressed in young flowers, *UFO* is transiently expressed in whorls 2 and 3, conferring domain specificity to *LFY* activity, which includes upregulation of target genes such as *AP3*, *PI* and *SEP3* (Lee et al., 1997; Winter et al., 2011). Ectopically expressing *UFO* throughout the flower results in sepal-to-petal conversions and *AP3* misexpression in whorl 1 organs (Lee et al., 1997), showing that *UFO* activity is epistatic to AP2-mediated repression of B-function. It is therefore not surprising that petal fate arises in whorl 2, where *UFO* is normally expressed, despite the presence of the AP2 repressor complex. Somewhat paradoxically, data indicate that *UFO* promotes transcription at the *AP3* promoter by targeting *LFY* (or an associated factor) for degradation (Chae et al., 2008). In light of our results, *UFO* might function at the *AP3* promoter to destabilize a repressor (Samach et al., 1999), such as AP2 and/or one of its complex members.

A balance between transcriptional activation and repression seems to underlie numerous aspects of floral organ fate specification. For example, activators of *AG* in the central domains of the flower compete with broadly distributed repressors of C-function to elicit region-specific transcription (Sridhar et al., 2006). This antagonism may 'fine-tune' *AG* expression levels to ensure appropriate floral organ identity. Such tuning mechanisms appear to exist in *Antirrhinum* and *Petunia*, in which mutations resulting in increased expression levels of C-class genes in their natural

domains of expression result in the outward expansion of C-function (Cartolano et al., 2007).

The identification of an AP2-TPL-HDA19 repressor complex involved in the direct repression of *AG* reveals increased functional redundancy between transcriptional regulators known to inhibit C-function (reviewed by Kaufmann et al., 2010a). For example, LUG, a Gro/Tup1-type co-repressor structurally similar to TPL, and its interacting partner SEU appear to be recruited by the A-class regulator AP1 (and *SEP3*) to repress *AG* (Sridhar et al., 2006; Liu and Karmarkar, 2008). LUG has been shown to interact physically with HDA19 (Gonzalez et al., 2007), indicating that AP1-SEU-LUG and AP2-TPL repressor complexes might share chromatin-modifying factors to repress *AG* in outer whorl organs. Additionally, LUG and SEU might be recruited by AP2 to negatively regulate target genes not examined in the present work (Grigorova et al., 2011). These observations indicate that physical interactions between factors operating redundantly in the repression of *AG* may be elaborate.

The transcriptional regulation of the B-class gene *AP3* also appears to be complex in nature. *AP3* promoter analyses have identified cis-acting elements required for expression in early floral development (stage 3-5), along with elements necessary for later expression in petals and stamens (Hill et al., 1998; Tilly et al., 1998). Three MADS-domain binding sequences (CArG) reside in the *AP3* promoter, the most proximal of which is apparently involved in the recruitment of a negative regulator affecting overall expression levels (Tilly et al., 1998). Promoter deletions, however, failed to identify elements potentially bound by AP2 or other repressors that restrict the outward spread of *AP3* expression. The close proximity of our elucidated AP2-TPL-HDA19 binding site to activating CArG sites in the *AP3* promoter (supplementary material Fig. S3B) might have complicated such analyses.

Although AP2 is clearly an important cadastral regulator of multiple floral organ identity genes, it is not obvious how AP2 acts as a floral organ identity gene itself (as described in the ABC model). Based on its classification as A-function, one of the proposed roles of AP2 is the specification of perianth fate. It is



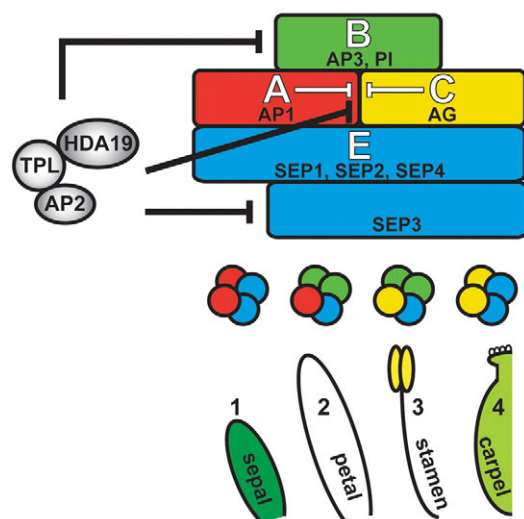

**Fig. 7. Model of AP2 function during flower development.** AP2 controls the outer expression boundaries of B-, C- and E-class genes by recruiting TPL and HDA19. This AP2 repression complex directly represses the C-class gene AG in whorls 1 (sepal) and 2 (petal) and the B-class gene AP3 and E-class gene SEP3 in whorl 1. AP2-mediated repression of the B-class gene PI in whorl 1 may occur through negative regulation of upstream activators, such as SEP3. MADS-domain products of the floral homeotic genes (colored circles) are predicted to interact with one another and with SEP proteins to form quartet complexes that regulate gene expression required for organ identity specification (Honma and Goto, 2001). Intermediary proteins might facilitate TPL and HDA19 association.

difficult to reconcile how AP2 can play an instructive role in perianth fate while negatively regulating genes (B-class and SEP3) responsible for promoting petal identity. It is possible that AP2 represses petal fate in whorl 1 and promotes it in whorl 2. Indeed, the normal domain of B-class gene expression is reduced in *ap2*; however, previous reports attribute this reduction to organ loss resulting from C-function spread (Jack et al., 1992; Goto and Meyerowitz, 1994). The restoration of AP3 and PI expression in whorls 2 and 3 of *ap2 ag* shows that AP2 is not necessary for B-class gene activation (supplementary material Fig. S6E,F). These restored organs show a mixture of petal and stamen fate (Bowman et al., 1991), further indicating that AP2 is not strictly required for petal identity. If AP2 were required, the ABC model predicts that its expression would expand into the central region of indeterminate *ag* flowers (which display reiterations of perianth organs), but this does not occur (Wollmann et al., 2010). Together, these results indicate that AP2 does not directly specify perianth fate and appears not to fit its original A-function designation. This is in agreement with other reports suggesting that the disruption of perianth identity in *ap2* mutants is an indirect effect reflecting an earlier role for AP2 in floral meristem specification (Okumuro et al., 1997; Litt, 2007; Causier et al., 2010). In this context, AP2 first contributes to floral meristem identity (required for the production of the perianth) and later regulates the expression domains of B-, C- and E-class genes that specify floral organ fate. This interpretation does not exclude the possibility that other factors confer true A-function in *Arabidopsis* and other plant species.

A future challenge will be to determine how well conserved the novel protein interactions and transcriptional processes

revealed in this study are in floral patterning events outside of *Arabidopsis*. SEP3 and B-class gene expression is commonly excluded from first whorl floral organs of angiosperms (Malcomber and Kellogg, 2005; Zahn et al., 2005a; Zahn et al., 2005b), and it will be of great interest to determine the role of AP2, TPL and HDA19 orthologs in this regulation. The perianths of some monocots and basal eudicots consist of two outer whorls of petaloid organs that express SEP3 or B-class genes (Kramer et al., 2003; Malcomber and Kellogg, 2005; Theissen and Melzer, 2007) and variations in AP2, TPL and HDA19 function in these species might contribute to this outward spread of petal fate. Characterizing such variation will provide valuable insight into the transcriptional mechanisms underlying the seemingly endless floral diversity of angiosperms.

#### Acknowledgements

We thank members of the Long laboratory, J. Chory, B. Chow, B. Crawford, F. Wellmer and M. Yanofsky for comments on the manuscript; M. Yanofsky for *sep3-2* seeds and vectors for in situ hybridization probes; M. Joens and J. Fitzpatrick for technical assistance with scanning electron microscopy; D. Nusinow for technical assistance with ChIP; and the *Arabidopsis* Biological Resource Center for the insertion line SALK\_112730.

#### Funding

This work was supported by the National Institutes of Health [grant GM072764 to J.A.L.]; the National Science Foundation [grant IOS0822411 to J.A.L.]; and a Natural Sciences and Engineering Research Council Postdoctoral Fellowship and San Diego Foundation Blasker Science and Technology Grant [to N.T.K.]. Deposited in PMC for release after 12 months.

#### Competing interests statement

The authors declare no competing financial interests.

#### Supplementary material

Supplementary material available online at <http://dev.biologists.org/lookup/suppl/doi:10.1242/dev.085407/-/DC1>

#### References

- Alonso, J. M., Stepanova, A. N., Leisse, T. J., Kim, C. J., Chen, H., Shinn, P., Stevenson, D. K., Zimmerman, J., Barajas, P., Cheuk, R. et al. (2003). Genome-wide insertional mutagenesis of *Arabidopsis thaliana*. *Science* **301**, 653-657.
- Aukerman, M. J. and Sakai, H. (2003). Regulation of flowering time and floral organ identity by a MicroRNA and its APETALA2-like target genes. *Plant Cell* **15**, 2730-2741.
- Bao, X., Franks, R. G., Levin, J. Z. and Liu, Z. (2004). Repression of AGAMOUS by BELLINGER in floral and inflorescence meristems. *Plant Cell* **16**, 1478-1489.
- Benhamed, M., Bertrand, C., Servet, C. and Zhou, D.-X. (2006). Arabidopsis GCN5, HD1, and TAF1/HAF2 interact to regulate histone acetylation required for light-responsive gene expression. *Plant Cell* **18**, 2893-2903.
- Bowler, C., Benvenuto, G., Laflamme, P., Molino, D., Probst, A. V., Tariq, M. and Paszkowski, J. (2004). Chromatin techniques for plant cells. *Plant J.* **39**, 776-789.
- Bowman, J. L., Smyth, D. R. and Meyerowitz, E. M. (1989). Genes directing flower development in *Arabidopsis*. *Plant Cell* **1**, 37-52.
- Bowman, J. L., Smyth, D. R. and Meyerowitz, E. M. (1991). Genetic interactions among floral homeotic genes of *Arabidopsis*. *Development* **112**, 1-20.
- Bowman, J. L., Sakai, H., Jack, T., Weigel, D., Mayer, U. and Meyerowitz, E. M. (1992). SUPERMAN, a regulator of floral homeotic genes in *Arabidopsis*. *Development* **114**, 599-615.
- Bowman, J. L., Alvarez, J., Weigel, D., Meyerowitz, E. M. and Smyth, D. R. (1993). Control of flower development in *Arabidopsis thaliana* by APETALA1 and interacting genes. *Development* **119**, 721-743.
- Buscarlet, M. and Stifani, S. (2007). The 'Marx' of Groucho on development and disease. *Trends Cell Biol.* **17**, 353-361.
- Busch, M. A., Bombliks, K. and Weigel, D. (1999). Activation of a floral homeotic gene in *Arabidopsis*. *Science* **285**, 585-587.
- Byzova, M. V., Franken, J., Aarts, M. G. M., de Almeida-Engler, J., Engler, G., Mariani, C., Van Lookeren Campagne, M. M. and Angenent, G. C. (1999). Arabidopsis STERILE APETALA, a multifunctional gene regulating inflorescence, flower, and ovule development. *Genes Dev.* **13**, 1002-1014.
- Cartolano, M., Castillo, R., Efremova, N., Kuckenberg, M., Zethof, J., Gerats, T., Schwarz-Sommer, Z. and Vandenbussche, M. (2007). A conserved

- microRNA module exerts homeotic control over *Petunia hybrida* and *Antirrhinum majus* floral organ identity. *Nat. Genet.* **39**, 901-905.
- Causier, B., Schwarz-Sommer, Z. and Davies, B. (2010). Floral organ identity: 20 years of ABCs. *Semin. Cell Dev. Biol.* **21**, 73-79.
- Causier, B., Ashworth, M., Guo, W. and Davies, B. (2012). The TOPLESS interactome: a framework for gene repression in *Arabidopsis*. *Plant Physiol.* **158**, 423-438.
- Chae, E., Tan, Q. K., Hill, T. A. and Irish, V. F. (2008). An *Arabidopsis* F-box protein acts as a transcriptional co-factor to regulate floral development. *Development* **135**, 1235-1245.
- Chen, X. (2004). A microRNA as a translational repressor of APETALA2 in *Arabidopsis* flower development. *Science* **303**, 2022-2025.
- Clough, S. J. and Bent, A. F. (1998). Floral dip: a simplified method for *Agrobacterium*-mediated transformation of *Arabidopsis thaliana*. *Plant J.* **16**, 735-743.
- Coen, E. S. and Meyerowitz, E. M. (1991). The war of the whorls: genetic interactions controlling flower development. *Nature* **353**, 31-37.
- Conner, J. and Liu, Z. (2000). LEUNIG, a putative transcriptional corepressor that regulates AGAMOUS expression during flower development. *Proc. Natl. Acad. Sci. USA* **97**, 12902-12907.
- Courey, A. J. and Jia, S. (2001). Transcriptional repression: the long and the short of it. *Genes Dev.* **15**, 2786-2796.
- Dinh, T. T., Girke, T., Liu, X., Yant, L., Schmid, M. and Chen, X. (2012). The floral homeotic protein APETALA2 recognizes and acts through an AT-rich sequence element. *Development* **139**, 1978-1986.
- Ditta, G., Pinyopich, A., Robles, P., Pelaz, S. and Yanofsky, M. F. (2004). The SEP4 gene of *Arabidopsis thaliana* functions in floral organ and meristem identity. *Curr. Biol.* **14**, 1935-1940.
- Drews, G. N., Bowman, J. L. and Meyerowitz, E. M. (1991). Negative regulation of the *Arabidopsis* homeotic gene AGAMOUS by the APETALA2 product. *Cell* **65**, 991-1002.
- Eshed, Y., Baum, S. F., Perea, J. V. and Bowman, J. L. (2001). Establishment of polarity in lateral organs of plants. *Curr. Biol.* **11**, 1251-1260.
- Franks, R. G., Wang, C., Levin, J. Z. and Liu, Z. (2002). SEUSS, a member of a novel family of plant regulatory proteins, represses floral homeotic gene expression with LEUNIG. *Development* **129**, 253-263.
- Gallavotti, A., Long, J. A., Stanfield, S., Yang, X., Jackson, D., Vollbrecht, E. and Schmidt, R. J. (2010). The control of axillary meristem fate in the maize *ramosa* pathway. *Development* **137**, 2849-2856.
- Gleave, A. P. (1992). A versatile binary vector system with a T-DNA organisational structure conducive to efficient integration of cloned DNA into the plant genome. *Plant Mol. Biol.* **20**, 1203-1207.
- Gonzalez, D., Bowen, A. J., Carroll, T. S. and Conlan, R. S. (2007). The transcription corepressor LEUNIG interacts with the histone deacetylase HDA19 and mediator components MED14 (SWP) and CDK8 (HEN3) to repress transcription. *Mol. Cell. Biol.* **27**, 5306-5315.
- Goto, K. and Meyerowitz, E. M. (1994). Function and regulation of the *Arabidopsis* floral homeotic gene PISTILLATA. *Genes Dev.* **8**, 1548-1560.
- Gray, S. and Levine, M. (1996). Transcriptional repression in development. *Curr. Opin. Cell Biol.* **8**, 358-364.
- Grigorova, B., Mara, C., Hollender, C., Sijacic, P., Chen, X. and Liu, Z. (2011). LEUNIG and SEUSS co-repressors regulate miR172 expression in *Arabidopsis* flowers. *Development* **138**, 2451-2456.
- Heisler, M. G., Hamant, O., Krupinski, P., Uyttewaal, M., Ohno, C., Jönsson, H., Traas, J. and Meyerowitz, E. M. (2010). Alignment between PIN1 polarity and microtubule orientation in the shoot apical meristem reveals a tight coupling between morphogenesis and auxin transport. *PLoS Biol.* **8**, e1000516.
- Hill, T. A., Day, C. D., Zondlo, S. C., Thackeray, A. G. and Irish, V. F. (1998). Discrete spatial and temporal cis-acting elements regulate transcription of the *Arabidopsis* floral homeotic gene APETALA3. *Development* **125**, 1711-1721.
- Honma, T. and Goto, K. (2001). Complexes of MADS-box proteins are sufficient to convert leaves into floral organs. *Nature* **409**, 525-529.
- Jack, T., Brockman, L. L. and Meyerowitz, E. M. (1992). The homeotic gene APETALA3 of *Arabidopsis thaliana* encodes a MADS box and is expressed in petals and stamens. *Cell* **68**, 683-697.
- Kadosh, D. and Struhl, K. (1998). Targeted recruitment of the Sin3-Rpd3 histone deacetylase complex generates a highly localized domain of repressed chromatin in vivo. *Mol. Cell. Biol.* **18**, 5121-5127.
- Kagale, S., Links, M. G. and Rozwadowski, K. (2010). Genome-wide analysis of ethylene-responsive element binding factor-associated amphiphilic repression motif-containing transcriptional regulators in *Arabidopsis*. *Plant Physiol.* **152**, 1109-1134.
- Kaufmann, K., Muiño, J. M., Jauregui, R., Airoidi, C. A., Smaczniak, C., Krajewski, P. and Angenent, G. C. (2009). Target genes of the MADS transcription factor SEPALLATA3: integration of developmental and hormonal pathways in the *Arabidopsis* flower. *PLoS Biol.* **7**, e1000090.
- Kaufmann, K., Pajoro, A. and Angenent, G. C. (2010a). Regulation of transcription in plants: mechanisms controlling developmental switches. *Nat. Rev. Genet.* **11**, 830-842.
- Kaufmann, K., Wellmer, F., Muiño, J. M., Ferrier, T., Wuest, S. E., Kumar, V., Serrano-Mislata, A., Madueño, F., Krajewski, P., Meyerowitz, E. M. et al. (2010b). Orchestration of floral initiation by APETALA1. *Science* **328**, 85-89.
- Kramer, E. M., Di Stilio, V. S. and Schluter, P. M. (2003). Complex patterns of gene duplication in the APETALA3 and PISTILLATA lineages of the Ranunculaceae. *Int. J. Plant Sci.* **164**, 1-11.
- Krizek, B. A., Lewis, M. W. and Fletcher, J. C. (2006). RABBIT EARS is a second-whorl repressor of AGAMOUS that maintains spatial boundaries in *Arabidopsis* flowers. *Plant J.* **45**, 369-383.
- Lamb, R. S., Hill, T. A., Tan, Q. K. and Irish, V. F. (2002). Regulation of APETALA3 floral homeotic gene expression by meristem identity genes. *Development* **129**, 2079-2086.
- Lee, I., Wolfe, D. S., Nilsson, O. and Weigel, D. (1997). A LEAFY co-regulator encoded by UNUSUAL FLORAL ORGANS. *Curr. Biol.* **7**, 95-104.
- Litt, A. (2007). An evaluation of A-function: evidence from the APETALA1 and APETALA2 gene lineages. *Int. J. Plant Sci.* **168**, 73-91.
- Liu, C., Xi, W., Shen, L., Tan, C. and Yu, H. (2009). Regulation of floral patterning by flowering time genes. *Dev. Cell* **16**, 711-722.
- Liu, Z. and Meyerowitz, E. M. (1995). LEUNIG regulates AGAMOUS expression in *Arabidopsis* flowers. *Development* **121**, 975-991.
- Liu, Z. and Karmarkar, V. (2008). Groucho/Top1 family co-repressors in plant development. *Trends Plant Sci.* **13**, 137-144.
- Lohmann, J. U., Hong, R. L., Hobe, M., Busch, M. A., Parcy, F., Simon, R. and Weigel, D. (2001). A molecular link between stem cell regulation and floral patterning in *Arabidopsis*. *Cell* **105**, 793-803.
- Long, J. A., Woody, S., Poethig, S., Meyerowitz, E. M. and Barton, M. K. (2002). Transformation of shoots into roots in *Arabidopsis* embryos mutant at the TOPLESS locus. *Development* **129**, 2797-2806.
- Long, J. A., Ohno, C., Smith, Z. R. and Meyerowitz, E. M. (2006). TOPLESS regulates apical embryonic fate in *Arabidopsis*. *Science* **312**, 1520-1523.
- Malcomber, S. T. and Kellogg, E. A. (2005). SEPALLATA gene diversification: brave new whorls. *Trends Plant Sci.* **10**, 427-435.
- Mandel, M. A. and Yanofsky, M. F. (1998). The *Arabidopsis* AGL9 MADS box gene is expressed in young flower primordia. *Sex. Plant Reprod.* **11**, 22-28.
- Miller, K. M., Tjeertes, J. V., Coates, J., Legube, G., Polo, S. E., Britton, S. and Jackson, S. P. (2010). Human HDAC1 and HDAC2 function in the DNA-damage response to promote DNA nonhomologous end-joining. *Nat. Struct. Mol. Biol.* **17**, 1144-1151.
- Ng, M. and Yanofsky, M. F. (2001). Activation of the *Arabidopsis* B class homeotic genes by APETALA1. *Plant Cell* **13**, 739-753.
- Ohta, M., Matsui, K., Hiratsu, K., Shinshi, H. and Ohme-Takagi, M. (2001). Repression domains of class II ERF transcriptional repressors share an essential motif for active repression. *Plant Cell* **13**, 1959-1968.
- Okamura, J. K., Szeto, W., Lotys-Prass, C. and Jofuku, K. D. (1997). Photo and hormonal control of meristem identity in the *Arabidopsis* flower mutants *apetala2* and *apetala1*. *Plant Cell* **9**, 37-47.
- Park, W., Li, J., Song, R., Messing, J. and Chen, X. (2002). CARPEL FACTORY, a Dicer homolog, and HEN1, a novel protein, act in microRNA metabolism in *Arabidopsis thaliana*. *Curr. Biol.* **12**, 1484-1495.
- Pauwels, L., Barbero, G. F., Geerinck, J., Tillemans, S., Grunewald, W., Pérez, A. C., Chico, J. M., Bossche, R. V., Sewell, J., Gil, E. et al. (2010). NINJA connects the co-repressor TOPLESS to jasmonate signalling. *Nature* **464**, 788-791.
- Pelaz, S., Ditta, G. S., Baumann, E., Wisman, E. and Yanofsky, M. F. (2000). B and C floral organ identity functions require SEPALLATA MADS-box genes. *Nature* **405**, 200-203.
- Pelaz, S., Tapia-López, R., Alvarez-Buylla, E. R. and Yanofsky, M. F. (2001). Conversion of leaves into petals in *Arabidopsis*. *Curr. Biol.* **11**, 182-184.
- Sakai, H., Medrano, L. J. and Meyerowitz, E. M. (1995). Role of SUPERMAN in maintaining *Arabidopsis* floral whorl boundaries. *Nature* **378**, 199-203.
- Samach, A., Klenz, J. E., Kohalmi, S. E., Risseuw, E., Haughn, G. W. and Crosby, W. L. (1999). The UNUSUAL FLORAL ORGANS gene of *Arabidopsis thaliana* is an F-box protein required for normal patterning and growth in the floral meristem. *Plant J.* **20**, 433-445.
- Schultz, E. A., Pickett, F. B. and Haughn, G. W. (1991). The FLO10 gene product regulates the expression domain of homeotic genes AP3 and PI in *Arabidopsis* flowers. *Plant Cell* **3**, 1221-1237.
- Smith, Z. R. and Long, J. A. (2010). Control of *Arabidopsis* apical-basal embryo polarity by antagonistic transcription factors. *Nature* **464**, 423-426.
- Smyth, D. R., Bowman, J. L. and Meyerowitz, E. M. (1990). Early flower development in *Arabidopsis*. *Plant Cell* **2**, 755-767.
- Sridhar, V. V., Surendrarao, A. and Liu, Z. (2006). APETALA1 and SEPALLATA3 interact with SEUSS to mediate transcription repression during flower development. *Development* **133**, 3159-3166.
- Szemenyei, H., Hannon, M. and Long, J. A. (2008). TOPLESS mediates auxin-dependent transcriptional repression during *Arabidopsis* embryogenesis. *Science* **319**, 1384-1386.
- Takeda, S., Matsumoto, N. and Okada, K. (2004). RABBIT EARS, encoding a SUPERMAN-like zinc finger protein, regulates petal development in *Arabidopsis thaliana*. *Development* **131**, 425-434.



- Theissen, G. and Melzer, R. (2007). Molecular mechanisms underlying origin and diversification of the angiosperm flower. *Ann. Bot.* **100**, 603-619.
- Tian, L., Fong, M. P., Wang, J. J., Wei, N. E., Jiang, H., Doerge, R. W. and Chen, Z. J. (2005). Reversible histone acetylation and deacetylation mediate genome-wide, promoter-dependent and locus-specific changes in gene expression during plant development. *Genetics* **169**, 337-345.
- Tilly, J. J., Allen, D. W. and Jack, T. (1998). The CArG boxes in the promoter of the Arabidopsis floral organ identity gene APETALA3 mediate diverse regulatory effects. *Development* **125**, 1647-1657.
- Weigel, D. and Meyerowitz, E. M. (1993). Activation of floral homeotic genes in Arabidopsis. *Science* **261**, 1723-1726.
- Weigel, D., Alvarez, J., Smyth, D. R., Yanofsky, M. F. and Meyerowitz, E. M. (1992). LEAFY controls floral meristem identity in Arabidopsis. *Cell* **69**, 843-859.
- Winter, C. M., Austin, R. S., Blanvillain-Baufumé, S., Reback, M. A., Monniaux, M., Wu, M.-F., Sang, Y., Yamaguchi, A., Yamaguchi, N., Parker, J. E. et al. (2011). LEAFY target genes reveal floral regulatory logic, cis motifs, and a link to biotic stimulus response. *Dev. Cell* **20**, 430-443.
- Wollmann, H., Mica, E., Todesco, M., Long, J. A. and Weigel, D. (2010). On reconciling the interactions between APETALA2, miR172 and AGAMOUS with the ABC model of flower development. *Development* **137**, 3633-3642.
- Yanofsky, M. F., Ma, H., Bowman, J. L., Drews, G. N., Feldmann, K. A. and Meyerowitz, E. M. (1990). The protein encoded by the Arabidopsis homeotic gene *agamous* resembles transcription factors. *Nature* **346**, 35-39.
- Yant, L., Mathieu, J., Dinh, T. T., Ott, F., Lanz, C., Wollmann, H., Chen, X. and Schmid, M. (2010). Orchestration of the floral transition and floral development in Arabidopsis by the bifunctional transcription factor APETALA2. *Plant Cell* **22**, 2156-2170.
- Zahn, L. M., Kong, H., Leebens-Mack, J. H., Kim, S., Soltis, P. S., Landherr, L. L., Soltis, D. E., Depamphilis, C. W. and Ma, H. (2005a). The evolution of the SEPALLATA subfamily of MADS-box genes: a preangiosperm origin with multiple duplications throughout angiosperm history. *Genetics* **169**, 2209-2223.
- Zahn, L. M., Leebens-Mack, J., DePamphilis, C. W., Ma, H. and Theissen, G. (2005b). To B or Not to B a flower: the role of DEFICIENS and GLOBOSA orthologs in the evolution of the angiosperms. *J. Hered.* **96**, 225-240.
- Zhao, L., Kim, Y., Dinh, T. T. and Chen, X. (2007). miR172 regulates stem cell fate and defines the inner boundary of APETALA3 and PISTILLATA expression domain in Arabidopsis floral meristems. *Plant J.* **51**, 840-849.
- Zhu, Z., Xu, F., Zhang, Y., Cheng, Y. T., Wiermer, M., Li, X. and Zhang, Y. (2010). Arabidopsis resistance protein SNC1 activates immune responses through association with a transcriptional corepressor. *Proc. Natl. Acad. Sci. USA* **107**, 13960-13965.
